1 **Chromosomal distribution of cyto-nuclear genes in a dioecious plant with sex**  
2 **chromosomes**

3

4 Josh Hough<sup>\*†</sup>, J. Arvid Ågren<sup>\*§</sup>, Spencer C.H. Barrett, and Stephen I. Wright

5

6 Department of Ecology and Evolutionary Biology, University of Toronto, Toronto, ON,

7 Canada, M5S 3B2

8

9 \* These authors contributed equally to this work; corresponding authors

10 † [josh.hough@utoronto.ca](mailto:josh.hough@utoronto.ca)

11 § [arvid.agren@utoronto.ca](mailto:arvid.agren@utoronto.ca)

12

13 Running title: Cyto-nuclear interactions in a dioecious plant

14 Key words: Cyto-nuclear interactions, co-adaptation, sexual conflict, gene transfer

15 Word count: 2421

16 Abstract word count: 245

17 Number of figures: 1

18

19

20

21

22

23

24 **Abstract**

25 The coordination between nuclear and organellar genes is essential to many aspects of  
26 eukaryotic life, including basic metabolism, energy production, and ultimately,  
27 organismal fitness. Whereas nuclear genes are bi-parentally inherited, mitochondrial and  
28 chloroplast genes are almost exclusively maternally inherited, and this asymmetry may  
29 lead to a bias in the chromosomal distribution of nuclear genes whose products act in the  
30 mitochondria or chloroplasts. In particular, because X-linked genes have a higher  
31 probability of co-transmission with organellar genes ( $2/3$ ) compared to autosomal genes  
32 ( $1/2$ ), selection for co-adaptation has been predicted to lead to an over-representation of  
33 nuclear-mitochondrial and nuclear-chloroplast genes on the X chromosome relative to  
34 autosomes. In contrast, the occurrence of sexually antagonistic organellar mutations  
35 might lead to selection for movement of cyto-nuclear genes from the X chromosome to  
36 autosomes to reduce male mutation load. Recent broad-scale comparative studies of N-mt  
37 distributions in animals have found evidence for these hypotheses in some species, but  
38 not others. Here, we use transcriptome sequences to conduct the first study of the  
39 chromosomal distribution of cyto-nuclear interacting genes in a plant species with sex  
40 chromosomes (*Rumex hastatulus*; Polygonaceae). We found no evidence of under- or  
41 over-representation of either N-mt or N-cp genes on the X chromosome, and thus no  
42 support for either the co-adaptation or the sexual-conflict hypothesis. We discuss how our  
43 results from a species with recently evolved sex chromosomes fit into an emerging  
44 picture of the evolutionary forces governing the chromosomal distribution of nuclear-  
45 mitochondrial and nuclear-chloroplast genes.

46

## 47 **Introduction**

48 The intimate relationships between nuclear and organellar genomes in eukaryotes  
49 represent some of the most striking examples of co-evolved mutualisms (Gillham 1994;  
50 Lane 2005; Aanen et al. 2014). The long co-evolutionary history of nuclear and  
51 mitochondrial genomes is perhaps best illustrated by the finding that the vast majority of  
52 mitochondrial genes in animals have been transferred to the nuclear genome (Adams and  
53 Palmer 2003; Rand et al. 2004; Burt and Trivers 2006). Indeed, animal mitochondria now  
54 encode only a few proteins after having lost the majority of their original genes (Berg and  
55 Kurland 2000; Ridley 2000; Bar-Yaacov et al. 2012). Moreover, almost one fifth of the  
56 *Arabidopsis thaliana* nuclear genome is of chloroplast origin (Martin 2003), suggesting  
57 that organellar-to-nuclear gene movement has played a crucial role in the evolution of  
58 plant genetic systems.

59         The evolution of cyto-nuclear interactions and the chromosomal distribution of  
60 the genes involved should be influenced by the contrasting modes of inheritance of  
61 organellar genes (maternal inheritance) and autosomal genes (bi-parental inheritance).  
62 This difference may, for example, result in conflict between nuclear and organellar genes  
63 over sex determination and sex ratio (Cosmides and Tooby 1981; Werren and  
64 Beukeboom 1998), and several mitochondrial genes in plants are known to cause male  
65 sterility (Burt and Trivers 2006; Touzet and Meyer 2014). In systems with XY sex  
66 determination, where males are the heterogametic (XY) and females the homogametic  
67 sex (XX), genes on the X chromosome spend 2/3 of their time in females (Rand et al.  
68 2001) and therefore share a female-biased inheritance pattern relative to Y-linked or  
69 autosomal genes, which may result in inter-genomic co-adaptation or conflict.

70 A potential consequence of inter-genomic conflict or co-adaptation between  
71 nuclear genes, whose products interact with mitochondrial or chloroplasts (mito-nuclear  
72 and cyto-nuclear genes, respectively) and other regions of the genome, is a shift in the  
73 chromosomal location of such genes, either becoming more or less abundant on the X  
74 chromosome. Several molecular mechanisms have been suggested to be involved in  
75 driving gene movement, including gene duplication followed by fixation and subsequent  
76 gene loss (Wu and Yujun Xu 2003), and autosomal gene duplications followed by the  
77 evolution of sex biased gene expression (Connallon and Clark 2011). The evolutionary  
78 mechanisms of this gene movement have also been explored by several recent studies  
79 (Drown et al. 2012; Hill and Johnson 2013; Dean et al. 2014; Rogell et al. 2014), and two  
80 main processes have been proposed to account for the movement of genes to or from the  
81 X chromosome. The co-adaptation hypothesis predicts that the co-transmission of X-  
82 linked and organellar genes should result in their co-adaptation, in which selection on  
83 beneficial epistatic interactions results in an over-representation of cyto-nuclear genes on  
84 the X chromosome relative to autosomes (Rand et al. 2004; Drown et al. 2012). In  
85 contrast, the sexual conflict hypothesis predicts the opposite chromosomal distribution,  
86 with more cyto-nuclear genes occurring on autosomes to alleviate mutation load in males.  
87 To date, empirical evidence for these hypotheses are mixed. Drown et al. (2012) used  
88 previously published reference genomes to examine the chromosomal distribution of N-  
89 mt genes in 16 vertebrates and found a strong under-representation of such genes on the  
90 X chromosomes relative to autosomes in 14 mammal species, but not in two avian  
91 species with *ZW* sex determining systems; note that the co-adaptation hypothesis does  
92 not predict that *ZW* systems should show a bias in the distribution of cyto-nuclear genes.

93 Dean et al. (2014) included seven additional species in their analysis with independently  
94 derived sex chromosomes and found that the under-representation of N-mt genes on the  
95 X chromosome was restricted to therian mammals and *Caenorhabditis elegans*.

96 Here, we use sex-linked and autosomal transcriptome sequences to investigate the  
97 chromosomal distributions of cyto-nuclear interactions in the dioecious annual plant  
98 *Rumex hastatulus* (Polygonaceae). Examining cyto-nuclear interactions within a plant  
99 species is of interest for several reasons (see Sloan 2014). First, plants carry an additional  
100 maternally inherited organellar genome that is absent in animals, the chloroplast genome.  
101 This provides an opportunity to compare the chromosomal distribution of two  
102 independent kinds of cyto-nuclear interacting genes: nuclear-mitochondrial and nuclear-  
103 chloroplast. Second, whereas animal sex chromosomes evolved hundreds of millions of  
104 years ago (180 MYA in mammals and 140 MYA in birds; Cortez et al. 2014), the origin  
105 of plant sex chromosomes is a more recent event (Charlesworth 2013). In *R. hastatulus*,  
106 sex chromosomes are thought to have evolved approximately 15-16 MYA (Navajas-  
107 Perez et al. 2005) and genes on the Y chromosome show evidence of degeneration,  
108 resulting in a considerable proportion of genes that are hemizygous on the X chromosome  
109 (Hough et al. 2014). *Rumex hastatulus* therefore provides an opportunity to test whether  
110 the early changes involved in sex chromosome evolution are associated with a  
111 concomitant shift in the chromosomal location of N-mt or N-cp genes. Moreover, the  
112 presence in this system of X-linked genes that have recently become hemizygous  
113 provides an opportunity to compare the chromosomal distributions of X-linked genes that  
114 are hemizygous versus those that have retained Y-linked alleles (X/Y genes).  
115 Hemizygous genes are particularly good candidates for evaluating evidence for co-

116 adaptation and/or sexual conflict because of their relatively older age (Hough et al. 2014),  
117 and because beneficial mutations in such genes are exposed to positive selection  
118 regardless of dominance and may therefore spread more rapidly.

119

## 120 **Methods**

### 121 *Gene identification and functional annotation*

122 We used sex-linked and autosomal transcriptome sequence data for *R. hastatulus* reported  
123 in Hough et al. (2014; GenBank Sequence Read Archive accession no. SRP041588), and  
124 obtained three sets of genes with which to test for an over- or under-representation of  
125 nuclear-mitochondrial or nuclear-chloroplast genes. In total our analyses included 1167  
126 autosomal genes, 624 X-linked genes, and 107 hemizygous X-linked genes. The X-linked  
127 and hemizygous X-linked genes were shared between sex chromosome systems in this  
128 species (see Hough et al. 2014; *Methods* and *SI Appendix* for full details regarding the  
129 identification of such genes from transcriptome sequence data). For autosomal genes, we  
130 included those previously identified as confidently autosomal in both *R. hastatulus* sex  
131 chromosome systems, as well as those uniquely identified in the XYY system. For each  
132 gene set, we queried the sequences translated in all reading frames against the *A. thaliana*  
133 protein database using the BLASTx homology search implemented in Blast2GO (Conesa  
134 et al. 2005), with a significance threshold (BLAST ExpectValue) of  $1 \times 10^{-3}$ , above which  
135 matches were not reported. We limited our searches to the *A. thaliana* protein database  
136 because sequence matches to this database returned more detailed functional information  
137 than is available for most other species in the NCBI plant database. We obtained  
138 BLASTx results for 1073 autosomal genes (90%), 567 X-linked genes (90%), and 95

139 hemizygous genes (89%). Gene Ontology (GO) terms associated with the hits from  
140 BLASTx queries were then retrieved using the ‘Mapping’ function in Blast2GO, which  
141 used BLAST accessions to link the queried sequences to functional information stored in  
142 the GO database (The Gene Ontology Consortium 2008). Gene names were retrieved  
143 using NCBI mapping files ‘gene info’ and ‘gene2accession’, and GO terms were assigned  
144 to query sequences using the ‘Annotation’ function with an E-Value-Hit-Filter of  $1 \times 10^{-6}$   
145 and an annotation cut off of 55 (default parameters). Finally, we ran InterProScan  
146 (Quevillon et al. 2005) to retrieve sequence domain/motif information and merged the  
147 corresponding annotations with previously identified GO terms. This procedure generated  
148 output files containing GO ID’s and functional descriptions for each gene in our data set  
149 (files will be uploaded to GitHub). The numbers of genes in our final data set with  
150 functional annotations and N-mt and N-cp GO annotations are summarized in Table 1.

151

### 152 *Statistical analyses*

153 We used a similar approach to Drown et al. (2012) and Dean et al. (2014) and estimated  
154 the number of N-mt and N-cp genes on the X chromosome and autosomes, and then  
155 compared each of these estimates to an expected number. The expected number of N-mt  
156 genes was obtained by calculating the product of the proportion of all genes in the data  
157 set with mitochondrial annotations (matching GO:0005739) and the number of annotated  
158 genes in a given gene set. The expected numbers of N-cp genes were calculated similarly,  
159 using GO:0009507. We then calculated the ratios of the observed-to-expected numbers  
160 for both N-mt and N-cp genes in each gene set. The observed-to-expected ratio is  
161 expected to equal one when there is no under- or over-representation, and greater than

162 one when there is an over-representation. We note that, unlike for X-linked genes, we did  
163 not have information regarding the particular chromosome locations for autosomal genes,  
164 and therefore could not obtain the expected numbers of N-mt and N-cp genes per-  
165 autosome as in previous studies (Drown et al. 2012; Dean et al. 2014). The expected  
166 numbers were thus calculated assuming that the set of autosomal genes represented a  
167 random sample of the autosomal chromosomes in this species, which is likely a valid  
168 assumption given that the sequences were obtained using whole transcriptome shotgun  
169 sequencing (Hough et al. 2014). Calculating the expected-to-observed ratios across X-  
170 linked, autosomal, and X-hemizygous genes thus allowed us to determine whether any of  
171 these gene sets contained an under- or over-representation of N-mt and N-cp genes  
172 compared to the expectation based on the proportion of such genes in the full data set. We  
173 tested the significance of over- or under-representation using Fisher's exact tests, and  
174 calculated 95% confidence intervals for the numbers of N-mt or N-cp genes using 10,000  
175 replicate bootstrapped samples. Given our sample sizes of genes with annotations (Table  
176 1), Fisher's Exact Tests allowed us to test for differences in the proportions of cyto-  
177 nuclear genes on autosomes versus the X-chromosome that were on the order of 5% with  
178 ~80% power, whereas power was reduced for smaller differences (Supplementary  
179 Material). Similarly, for hemizygous X-linked genes, we calculate that differences of  
180 approximately~10% could be detected with ~80% power. All data analysis was done in R  
181 (R Development Core Team 2013; scripts will be available for download from GitHub).

182

## 183 **Results and Discussion**



184 It has been suggested that cyto-nuclear genes may be either over- or under-represented on  
185 the X chromosome compared to autosomes, depending on whether their interactions are  
186 driven by co-adaptation or sexual conflict (Rand et al. 2001; Drown et al. 2012; Hill and  
187 Johnson 2013; Dean et al. 2014; Rogell et al. 2014). We annotated sex-linked and  
188 autosomal transcriptome sequences to test these predictions in the dioecious plant *R.*  
189 *hastatulus*. We found that neither mitochondria- or chloroplast-interacting nuclear genes  
190 were under- or over-represented on the X chromosome (Fisher's exact test,  $P = 0.4947$   
191 and  $P = 0.3074$ , respectively; Figure 1). This pattern indicates that neither the co-  
192 adaptation nor the sexual conflict hypothesis alone is sufficient to explain the  
193 chromosomal distribution of cyto-nuclear genes in *R. hastatulus*.

194         There are several factors that are expected to be important in determining cyto-  
195 nuclear gene distributions, and these may explain the lack of bias in *R. hastatulus*. For  
196 example, under both the co-adaptation and sexual conflict hypotheses, the age of the sex  
197 chromosomes will determine the extent to which selection (either for co-adaptation, or  
198 sexual antagonism) has had time to operate, which depends on the rate of gene movement  
199 onto and off of the sex chromosomes. Whereas previous studies of cyto-nuclear genes in  
200 animals have focused almost exclusively on ancient sex chromosome systems (Drown et  
201 al. 2012; Dean et al. 2014; Rogell et al. 2014), our study focused on a dioecious plant  
202 species in which sex chromosomes evolved more recently (~15 MYA; Navajas-Perez et  
203 al. 2005), and many genes likely stopped recombining much more recently (Hough et al.,  
204 2014). The lack of bias in the chromosomal distribution of cyto-nuclear genes may  
205 therefore reflect the recent time scale of sex chromosome evolution rather than the  
206 absence of biased gene movement. The relatively young age of sex chromosomes may

207 also have played a role in the lack of bias reported in the sex and neo-sex chromosomes  
208 in three-spined stickleback, which evolved ~10 MYA (Kondo et al. 2004) and ~2 MYA,  
209 respectively (Natri et al. 2013). Comparative studies of sex chromosomes of different age  
210 will be central for understanding the rate at which organellar gene movement occurs.

211 In addition to being evolutionarily older, X-linked hemizygous genes are expected  
212 to show a greater effect of over-or under-representation than genes with both X- and Y-  
213 alleles because recessive mutations (involved in either co-adaptation or sexual conflict)  
214 will be exposed to selection instead of masked by an alternate allele in a heterozygous  
215 genotype. We detected a slightly greater under-representation of X-hemizygous N-mt  
216 genes compared to autosomes or X-genes with retained Y-alleles, but the effect was not  
217 statistically significant ( $P = 0.4947$ ). The opposite pattern was evident for N-cp genes,  
218 which were slightly over-represented on hemizygous genes, but again this effect was not  
219 significant ( $P = 0.3074$ ). A larger sample of hemizygous genes would be required to more  
220 confidently assess whether such genes are in fact more often involved in cyto-nuclear  
221 interactions than other genes on the X chromosome, and to test whether the opposite  
222 pattern for N-mt and N-cp hemizygous genes is a result of a different rate of nuclear gene  
223 transfer between mitochondrial and chloroplast genomes. In particular, the smaller  
224 number of hemizygous X-linked genes in our data set implies that power was reduced for  
225 this comparison, such that a ~5% difference could only be detected with ~60% power  
226 (see Supplementary Material).

227 Another factor that will affect the chromosomal distribution of cyto-nuclear genes  
228 is the number of N-mt and N-cp genes that were located on the autosome from which the  
229 sex chromosomes evolved. Since the origins of mitochondria and chloroplasts both vastly

230 predate that of sex chromosomes (1.5-2 BYA compared to < 200 MYA; Dyall et al.  
231 2004; Timmis et al. 2004; Cortez et al. 2014), gene transfer from organellar genomes to  
232 the nuclear genome began long before the evolution of sex chromosomes. A bias in the  
233 chromosomal distribution of cyto-nuclear genes in either direction may therefore arise if  
234 the ancestral autosome was particularly rich or poor in cyto-nuclear genes. Indeed, it is  
235 striking that autosomes in the animal species previously examined exhibited extensive  
236 variation in the relative number of N-mt genes (see Drown et al. 2012 Figure 1 and Dean  
237 et al. 2014 Figure 1 and Figure 2). That the ancestral number of N-mt and N-cp genes is  
238 likely to be important is highlighted by the fact that the majority of genes involved in  
239 mitochondrial DNA and RNA metabolism in *A. thaliana* are found on chromosome III  
240 (Elo et al. 2003). If such a biased autosomal distribution of organellar variation is  
241 representative of the ancestral sex chromosomes, the X chromosome could carry  
242 significantly more N-mt or N-cp genes because of this ancestral gene number rather than  
243 a biased rate of gene movement. This effect is likely exacerbated in early sex  
244 chromosome systems, where the majority of genes may not have experienced  
245 opportunities for movement. Genetic mapping and comparative genomic studies of genes  
246 that have transferred from organellar genomes after the origin of sex chromosomes may  
247 provide a means to control for ancestral differences in gene number and provide a better  
248 test of biases in organellar-nuclear gene movement.

249         To conclude, our study is the first investigation of the extent to which co-  
250 adaptation and sexual conflict have shaped the chromosomal distribution of cyto-nuclear  
251 genes in a plant species with sex chromosomes. We found no sign of under- or over-  
252 representation of either N-mt or N-cp genes on the X chromosome, implying that neither

253 co-adaptation nor sexual conflict alone can explain the chromosomal distributions of  
254 these genes. Instead, we suggest that additional factors, including the age of sex  
255 chromosomes and the time that has elapsed since X-Y recombination became suppressed,  
256 are likely to have been important determinants of the patterns we observed. To determine  
257 whether the lack of under-representation of mito-nuclear genes on the X chromosome  
258 reflects an absence of gene movement, future studies should focus on quantifying rates of  
259 gene movement after sex chromosome origination, and consider the extent to which  
260 neutral processes including the number of mito-nuclear genes on ancestral sex  
261 chromosomes have played an important role in shaping the current chromosomal  
262 distributions of such genes. Cyto-nuclear conflict and co-evolution have undoubtedly  
263 played a major role in many aspects of genome evolution in both plant and animal  
264 systems, and the previously reported evidence from therian mammals and *C. elegans*  
265 (Drown et al. 2012; Dean et al. 2014) suggests that sexual conflict and co-adaptation  
266 might represent important mechanisms driving chromosomal gene movement; however,  
267 it remains unclear whether these processes have also shaped the chromosomal  
268 distribution cyto-nuclear genes in plants.

269

## 270 **Acknowledgements**

271 We thank Rebecca Dean and Devin M Drown for comments on the manuscript. This  
272 research was supported by Discovery Grants to SCHB and SIW from the Natural  
273 Sciences and Engineering Council of Canada. JH was supported by an Ontario Graduate  
274 Fellowship and JAÅ by a Junior Fellowship from Massey College.

275

276 **References**

- 277 Aanen DK, Spelbrink JN, Beekman M. 2014. What cost mitochondria? The maintenance  
278 of functional mitochondrial DNA within and across generations. *Philos Trans R*  
279 *Soc Lond B Biol Sci.* 369.
- 280 Adams KL, Palmer JD. 2003. Evolution of mitochondrial gene content: gene loss and  
281 transfer to the nucleus. *Mol Phylogenet Evol.* 29:380–395.
- 282 Bar-Yaacov D, Blumberg A, Mishmar D. 2012. Mitochondrial-nuclear co-evolution and  
283 its effects on OXPHOS activity and regulation. *Biochim Biophys Acta* 1819:1107–  
284 1111.
- 285 Berg OG, Kurland CG. 2000. Why mitochondrial genes are most often found in nuclei.  
286 *Mol Biol Evol.* 17:951–961.
- 287 Burt A, Trivers R. 2006. *Genes in conflict: the biology of selfish genetic elements.*  
288 Cambridge, MA: Belknap Press of Harvard University Press.
- 289 Charlesworth D. 2013. Plant sex chromosome evolution. *J Exp Bot.* 64:405–420.
- 290 Conesa A, et al. 2005. Blast2GO: a universal tool for annotation, visualization and  
291 analysis in functional genomics research. *Bioinformatics* 21:3674–3676.
- 292 Connallon T, Clark AG. 2011. The resolution of sexual antagonism by gene  
293 duplication. *Genetics* 187:919–937.
- 294 Cortez D, et al. 2014. Origins and functional evolution of Y chromosomes across  
295 mammals. *Nature* 508:488–493.

- 296 Cosmides LM, Tooby J. 1981. Cytoplasmic inheritance and intragenomic conflict. *J*  
297 *Theor Biol.* 89:83–129.
- 298 Dean R, Zimmer F, Mank JE. 2014. The potential role of sexual conflict and sexual  
299 selection in shaping the genomic distribution of mito-nuclear genes. *Genome Biol*  
300 *Evol.* 6:1096–1104.
- 301 Drown DM, Preuss KM, Wade MJ. 2012. Evidence of a paucity of genes that interact  
302 with the mitochondrion on the X in mammals. *Genome Biol Evol.* 4:763–768.
- 303 Dyall SD, Brown MT, Johnson PJ. 2004. Ancient invasions: from endosymbionts to  
304 organelles. *Science* 304:253–257.
- 305 Elo A, Lyznik A, Gonzalez DO, Kachman SD, Mackenzie SA. 2003. Nuclear genes that  
306 encode mitochondrial proteins for DNA and RNA metabolism are clustered in the  
307 *Arabidopsis* genome. *Plant Cell* 15:1619–1631.
- 308 Gillham NW. 1994. *Organelle genes and genomes*. New York: Oxford University Press.
- 309 Hill GE, Johnson JD. 2013. The mitonuclear compatibility hypothesis of sexual selection.  
310 *Proc R Soc B.* 280:20131314.
- 311 Hough J, Hollister JD, Wang W, Barrett SCH, Wright SI. 2014. Genetic degeneration of  
312 old and young Y chromosomes in the flowering plant *Rumex hastatulus*. *Proc Natl*  
313 *Acad Sci U S A.* 111:7713–7718
- 314 Kondo M, Nanda I, Hornung U, Schmid M, Scharl M. 2004. Evolutionary origin of the  
315 medaka Y chromosome. *Curr Biol.* 14:1664–1669.

- 316 Lane N. 2005. Power, sex, suicide: mitochondria and the meaning of life. Oxford, UK:  
317 Oxford University Press.
- 318 Martin W. 2003. Gene transfer from organelles to the nucleus: frequent and in big chunks.  
319 Proc Natl Acad Sci U S A. 100:8612–8614.
- 320 Natri HM, Shikano T, Merilä J. 2013. Progressive recombination suppression and  
321 differentiation in recently evolved neo-sex chromosomes. Mol Biol Evol. 30:1131–  
322 1144.
- 323 Navajas-Perez R, et al. 2005. The evolution of reproductive systems and sex-determining  
324 mechanisms within *Rumex* (Polygonaceae) inferred from nuclear and  
325 chloroplastidial sequence data. Mol Biol Evol. 22:1929–1939.
- 326 Quevillon E, et al. 2005. InterProScan: protein domains identifier. Nucleic Acids Res. 33:  
327 W116–120.
- 328 R Development Core Team. 2013. R: A language and environment for statistical  
329 computing. Vienna, Austria: R Foundation for Statistical Computing.
- 330 Rand DM, Clark AG, Kann LM. 2001. Sexually antagonistic cytonuclear fitness  
331 interactions in *Drosophila melanogaster*. Genetics 159:173–187.
- 332 Rand DM, Haney RA, Fry AJ. 2004. Cytonuclear coevolution: the genomics of  
333 cooperation. Trends Ecol Evol. 19:645–653.
- 334 Ridley M. 2000. Mendel's demon: gene justice and the complexity of life. London:  
335 Weidenfeld & Nicolson.

- 336 Rogell B, Dean R, Lemos B, Dowling DK. 2014. Mito-nuclear interactions as drivers of  
337 gene movement on and off the X chromosome. *BMC Genomics* 15:330.
- 338 Sloan DB. 2014. Using plants to elucidate the mechanisms of cytonuclear co-evolution.  
339 *New Phytol.* doi: 10.1111/nph.12835
- 340 The Gene Ontology Consortium. 2008. The Gene Ontology project in 2008. *Nucleic  
341 Acids Res.* 36:D440–444.
- 342 Timmis JN, Ayliffe MA, Huang CY, Martin W. 2004. Endosymbiotic gene transfer:  
343 organelle genomes forge eukaryotic chromosomes. *Nat Rev Genet.* 5:123–135.
- 344 Touzet P, Meyer EH. 2014. Cytoplasmic male sterility and mitochondrial metabolism in  
345 plants. *Mitochondrion* doi: 10.1016/j.mito.2014.04.009
- 346 Werren JH, Beukeboom LW. 1998. Sex determination, sex ratios, and genetic conflict.  
347 *Annu Rev Ecol Syst.* 29:233–261.
- 348 Wu CI, Yujun Xu E. 2003. Sexual antagonism and X inactivation—the SAXI  
349 hypothesis. *Trends Genet.* 19:243–247.
- 350
- 351
- 352
- 353
- 354
- 355
- 356



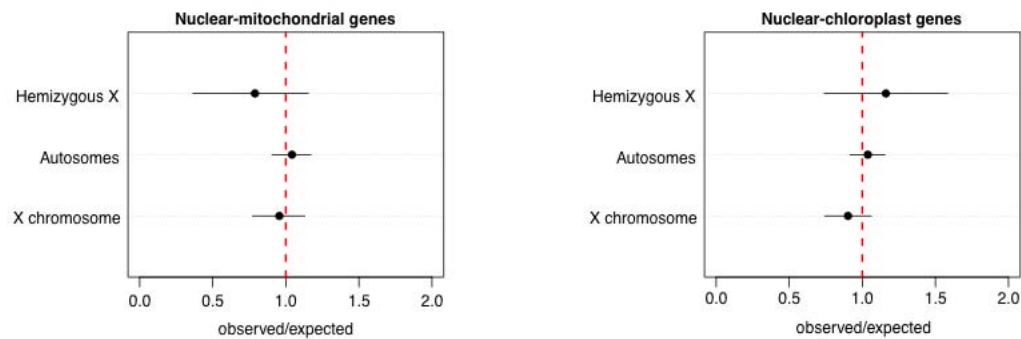

357

358

359 **Figure 1.** Representation of the chromosomal location of cyto-nuclear genes in *Rumex*  
 360 *hastatulus*. Dots represent the observed to expected ratio of mito-nuclear (N-mt) and  
 361 chloro-nuclear (N-cp) genes on autosomes, the X chromosome, and hemizygous X genes,  
 362 with the 95% confidence intervals estimated by bootstrapping (10,000 replicates). The  
 363 vertical dotted line at 1 represents no over- or under-representation.

364

365

| Gene sets         | <b>Autosomal</b> | <b>X-linked</b> | <b>X-hemizygous</b> |
|-------------------|------------------|-----------------|---------------------|
| Original data set | 1167             | 624             | 107                 |
| With annotation   | 1073             | 567             | 95                  |
| With N-mt GO ID   | 194              | 94              | 13                  |
| With N-cp GO ID   | 222              | 102             | 22                  |

366

367 **Table 1.** Number of genes in our data set, including those for which we obtained  
 368 functional annotations (see Methods) and those with nuclear-mitochondrial and nuclear-  
 369 chloroplast GO annotations.
